# Supplementary material for: Work routines moderate the association between eveningness and poor psychological well-being
Source: PubMed Central journal article supplement (PMC5889056; doi:10.1371/journal.pone.0195078), 2018-04-06
Supplement: pone.0195078.s004.pdf [file pone.0195078.s004.pdf]

**Table S1 - Regression analysis predicting a mediation effect of self-efficacy and working schedule flexibility on sleep onset time and well-being status.**

|         | Outcome | Predictor        | Mediator                     | B     | SE   | t     | 95% CIs |      | P-value |
|---------|---------|------------------|------------------------------|-------|------|-------|---------|------|---------|
| Model 1 |         |                  |                              |       |      |       |         |      |         |
|         | WHO-5   | Sleep Onset Time | Self-efficacy                | -6.07 | 7.02 | -0.86 | -19.86  | 7.71 | 0.387   |
| Model 2 |         |                  |                              |       |      |       |         |      |         |
|         | WHO-5   | Sleep Onset Time | Working Schedule Flexibility | 0.05  | 0.02 | 2.54  | 0.01    | 0.08 | 0.011   |
| Model 3 |         |                  |                              |       |      |       |         |      |         |
|         | WHO-5   | Sleep Onset Time | Self-efficacy                | -8.44 | 7.05 | -1.19 | -22.55  | 5.66 | 0.231   |
|         |         |                  | Working Schedule Flexibility | 0.05  | 0.02 | 2.54  | 0.01    | 0.09 | 0.011   |

Models 1 and 2: Simple mediation effect on sleep onset time and well-being status.

Model 3: Serial multiple mediation effect on sleep onset time and well-being status.
