# Supplementary material for: Work routines moderate the association between eveningness and poor psychological well-being
Source: PubMed Central journal article supplement (PMC5889056; doi:10.1371/journal.pone.0195078), 2018-04-06
Supplement: pone.0195078.s005.pdf [file pone.0195078.s005.pdf]

**Table S2 - Direct, indirect, and total effects of sleep onset time on psychological well-being.**

|                       | B      | SE   | t     | 95% CI |       | P-value | Sobel test |         |
|-----------------------|--------|------|-------|--------|-------|---------|------------|---------|
|                       |        |      |       |        |       |         | Z          | P-value |
| Model 1               |        |      |       |        |       |         |            |         |
| Total effect          | -12.78 | 3.84 | -3.33 | -20.32 | -5.24 | <0.001  | -          | -       |
| Direct effect         | -11.72 | 3.65 | -3.22 | -18.88 | -4.57 | 0.001   | -          | -       |
| Indirect effect       | -1.05  | 1.32 | -     | -3.88  | 1.51  | -       | -0.86      | 0.390   |
| Model 2               |        |      |       |        |       |         |            |         |
| Total effect          | -11.97 | 3.63 | -3.29 | -19.10 | -4.83 | 0.001   | -          | -       |
| Direct effect         | -11.72 | 3.65 | -3.22 | -18.88 | -4.57 | 0.001   | -          | -       |
| Indirect effect       | -0.24  | 0.33 | -     | -1.24  | 0.22  | -       | -0.72      | 0.469   |
| Model 3               |        |      |       |        |       |         |            |         |
| Total effect          | -13.45 | 3.83 | -3.51 | -20.97 | -5.92 | <0.001  | -          | -       |
| Direct effect         | -11.73 | 3.64 | -3.22 | -18.88 | -4.57 | 0.001   | -          | -       |
| Total Indirect effect | -1.72  | 1.36 | -     | -4.83  | 0.74  | -       | -          | -       |
| Indirect effect 1     | -1.46  | 1.32 | -     | -4.63  | 0.69  | -       | -          | -       |
| Indirect effect 2     | -0.01  | 0.02 | -     | -0.12  | 0.01  | -       | -          | -       |
| Indirect effect 3     | -0.24  | 0.34 | -     | -1.12  | 0.25  | -       | -          | -       |

Model 1: Simple mediation model. Mediator = Self-efficacy.

Model 2: Simple mediation model. Mediator = Working schedule flexibility.

Model 3: Serial multiple mediation model. Mediator 1 = Self-efficacy; Mediator 2 = Working schedule flexibility.

Indirect effect 1: Sleep onset time > self-efficacy > psychological well-being.

Indirect effect 2: Sleep onset time > self-efficacy > work schedule flexibility > psychological well-being.

Indirect effect 3: Sleep onset time > working schedule flexibility > psychological well-being.
